# Supplementary material
Source: Research Square preprint supplement (doi:10.21203/rs.3.rs-9533046/v1)
Supplement: Supplementary file 1 [file 444b5381ef168f5610ed5606.pdf]

**Table 1** MASI Scores of the Left and Right Half-Faces Before Treatment and 1 Month After 3 Treatments

|       | Before Treatment  | 1 Month After 3 Treatments | Z      | P       |
|-------|-------------------|----------------------------|--------|---------|
| Left  | 6.10 (3.65, 7.00) | 3.11 (1.60, 5.20)          | -5.233 | <0.001* |
| Right | 5.87 (4.10, 7.08) | 3.57 (2.20, 5.20)          | -5.186 | <0.001* |
| Z     | -1.066            | -2.584                     |        |         |
| p     | 0.286             | 0.01*                      |        |         |

**Table 2** Improvement Rate of MASI Score in the Left and Right Half-Faces

|       | Improvement Rate  | Z      | P      |
|-------|-------------------|--------|--------|
| Left  | 0.48 (0.40, 0.59) | -2.604 | 0.009* |
| Right | 5.87 (4.10, 7.08) |        |        |

**Table 3** Response Rate of MASI Score in the Left and Right Half-Faces n (%)

|       | Non-response | Response    | P      |
|-------|--------------|-------------|--------|
| Left  | 4 (10.53%)   | 34 (89.47%) | 0.004* |
| Right | 13 (34.21%)  | 25 (65.79%) |        |

**Table 4** PGA Scores of the Left and Right Half-Faces n (%)

|       | Cleared      | Marked improvement | Moderate improvement | Mild improvement | No improvement | Worsened     | Z     | P      |
|-------|--------------|--------------------|----------------------|------------------|----------------|--------------|-------|--------|
| Left  | 0<br>(0.00%) | 15<br>(39.47%)     | 15<br>(39.47%)       | 4<br>(10.53%)    | 4<br>(10.53%)  | 0<br>(0.00%) | -4.24 | <0.01* |
| Right | 0<br>(0.00%) | 4<br>(10.53%)      | 12<br>(31.58%)       | 18<br>(47.37%)   | 3<br>(7.89%)   | 1<br>(2.63%) |       |        |

**Table 5** Patient satisfaction survey n (%)

|       | Very satisfied | Satisfied      | Generally satisfied | Dissatisfied | Z      | P      |
|-------|----------------|----------------|---------------------|--------------|--------|--------|
| Left  | 8<br>(21.05%)  | 24<br>(63.16%) | 5<br>(13.16%)       | 1<br>(2.63%) | -3.873 | <0.01* |
| Right | 5<br>(13.26%)  | 16<br>(42.11%) | 15<br>(39.47%)      | 2<br>(5.26%) |        |        |

**Table 6** Data measured by the CBS Skin Analyzer

|                                                |       | Before Treatment              | 1 Month After 3 Treatments   | Z      | P       |
|------------------------------------------------|-------|-------------------------------|------------------------------|--------|---------|
| Brown area<br>(mm <sup>2</sup> )               | Left  | 907.86<br>(628.82,1102.37)    | 662.50<br>(424.18, 818.73)   | -5.373 | <0.001* |
|                                                | Right | 1071.78<br>(676.79,1274.00)   | 823.66<br>(523.10, 1003.87)  | -5.373 | <0.001* |
|                                                | Z     | -1.864                        | -2.005                       |        |         |
|                                                | P     | 0.062                         | 0.045*                       |        |         |
| Deep pigment area<br>(mm <sup>2</sup> )        | Left  | 957.44<br>(620.85, 1618.14)   | 492.90<br>(346.93, 935.97)   | -5.316 | <0.001* |
|                                                | Right | 780.45<br>(532.49, 1772.30)   | 491.15<br>(427.90, 920.82)   | -5.171 | <0.001* |
|                                                | Z     | -0.925                        | -0.603                       |        |         |
|                                                | P     | 0.355                         | 0.547                        |        |         |
| Superficial pigment area<br>(mm <sup>2</sup> ) | Left  | 555.80<br>(361.43, 758.66)    | 349.21<br>(250.85, 396.30)   | -5.359 | <0.001* |
|                                                | Right | 558.13<br>(356.63, 716.15)    | 440.19<br>(300.82, 556.50)   | -4.968 | <0.001* |
|                                                | Z     | -0.268                        | -4.329                       |        |         |
|                                                | P     | 0.778                         | <0.001*                      |        |         |
| Red area<br>(mm <sup>2</sup> )                 | Left  | 1217.74<br>(750.94, 1584.33)  | 599.18<br>(386.33, 771.78)   | -5.373 | <0.001* |
|                                                | Right | 1213.05<br>(667.89, 1648.01)  | 764.65<br>(459.53, 897.62)   | -5.345 | <0.001* |
|                                                | Z     | -0.355                        | -4.431                       |        |         |
|                                                | P     | 0.722                         | <0.001*                      |        |         |
| Pore count<br>(n)                              | Left  | 1732.61<br>(1446.25, 2099.00) | 987.16<br>(774.00, 1165.25)  | -5.373 | <0.001* |
|                                                | Right | 1708.66<br>(1440.50, 2117.50) | 1176.37<br>(890.50, 1522.75) | -5.373 | <0.001* |
|                                                | Z     | 0.094                         | -4.880                       |        |         |
|                                                | P     | 0.925                         | <0.001*                      |        |         |

**Table 7** Incidence of Adverse Reactions in the Left and Right Half-Faces n (%)

|             | Left         | Right        | P     |
|-------------|--------------|--------------|-------|
| Erythema    | 38 (100.00%) | 38 (100.00%) | -     |
| Pain        | 38 (100.00)  | 38 (100.00%) | -     |
| Dry scaling | 4 (10.53%)   | 2 (5.26%)    | 0.500 |
| Crusting    | 4 (10.53%)   | 0 (0.00%)    | 0.125 |

**Table 8** Duration of Adverse Reactions in the Left and Right Half-Faces (days)

|       | Pain duration(d)  | Erythema duration(d) |
|-------|-------------------|----------------------|
| Left  | 1.00 (1.00, 2.00) | 3.00 (2.00, 3.00)    |
| Right | 1.00 (1.00, 2.00) | 3.00 (2.00, 3.00)    |
| Z     | -0.022            | -0.780               |
| P     | 0.983             | 0.435                |

**Table 9** VAS Pain Scores of the Left and Right Half-Faces n (%)

|       | 0 score      | 1-3 score      | 4-6 score      | 7-10 score   | Z      | P      |
|-------|--------------|----------------|----------------|--------------|--------|--------|
| Left  | 0<br>(0.00%) | 22<br>(57.89%) | 16<br>(42.11%) | 0<br>(0.00%) | -2.828 | 0.005* |
| Right | 0<br>(0.00%) | 30<br>(78.95%) | 8<br>(21.05%)  | 0<br>(0.00%) |        |        |

**Table 10** Recurrence Rate Based on MASI Score in the Left and Right Half-Faces n (%)

|       | Recurrence | No recurrence | P     |
|-------|------------|---------------|-------|
| Left  | 8 (21.05%) | 30 (78.95%)   | 1.000 |
| Right | 7 (18.42%) | 29 (81.58%)   |       |
